# Supplementary material
Source: Springer Nature journal article supplement (https://www.springermedizin.de/resource/supplementary/12990_2008_191_MOESM5_ESM.pdf/9612906)

# Left (CCI-IoN) Side

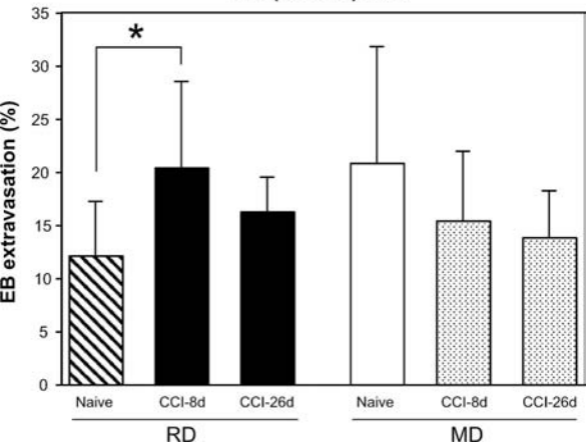

Supplement: MOESM5 [file 9612906]
